# Supplementary material for: Phase engineering to construct In2S3 heterophase junctions and abundant active boundaries and surfaces for efficient Pyro-PEC performance in CdS/In2S3
Source: Royal Society of Chemistry journal article supplement (doi:10.1039/d4ta01455c), 2024-01-01
Supplement: d4ta01455c1.pdf [file d4ta01455c1.pdf]

## Supporting information

$$\alpha h\nu = A(h\nu - E_g)^n \quad (1)$$

$$E_{FE} = h\nu - E_{cutoff} \quad (2)$$

$$E_{VB} = E_{FE} + E_{onset} - E_e \quad (3)$$

$$E_{CB} = E_{VB} - E_g \quad (4)$$

where  $\alpha$ ,  $\nu$  and  $E_g$  are the absorption coefficient, incident light frequency and band gap, respectively, and  $h$  and  $A$  are constants. Typically, the value of  $n$  is 2 for indirect bandgap semiconductors and 1/2 for direct bandgap semiconductors. Here,  $n = 2$ .  $h\nu$  is the radiant energy ( $h\nu=21.22\text{eV}$ ),  $E_e$  is the energy of free electrons on the hydrogen scale ( $E_e = 4.5 \text{ eV}$ ).

$$E_{RHE} = E_{Ag/AgCl} + 0.0591PH + 0.1976 V \quad (5)$$

$$ABPE = (J_{light} - J_{dark}) \times \left( \frac{1.23 - V_{RHE}}{P_{light}} \right) \quad (6)$$

Here,  $J_{light}$  and  $J_{dark}$  is the photocurrent density under light and dark conditions.  $V_{RHE}$  represents the relationship between applied potential and RHE, and  $P_{light}$  is the intensity of incident light ( $100 \text{ mW/cm}^2$ , AM 1.5 G).

$$IPCE = \frac{1240J}{\lambda P_{light}} \quad (7)$$

$$1/c^2 = \frac{2(V - V_{fb} - \frac{K_B T}{e})}{\epsilon \epsilon_0 e A^2 N_d} \quad (8)$$

$$N_d = \frac{2}{\epsilon \epsilon_0 e} \left[ \frac{1}{c^2} \frac{d}{d_V} \right]^{-1} \quad (9)$$

$$J_{H_2O} = J_{abs} \times \eta_{bulk} \times \eta_{surface} \quad (10)$$

$$J_{Na_2SO_3} = J_{abs} \times \eta_{bulk} \quad (11)$$

$$\eta_{bulk} = J_{Na_2SO_3} / J_{abs} \quad (12)$$

$$\eta_{surface} = J_{H_2O} / J_{Na_2SO_3} \quad (13)$$

$J_{H_2O}$  stands for photocurrent density, and  $J_{abs}$  refers to photon absorption represented by current density (100 % photocurrent of APCE is assumed).  $c$  represents the space charge capacitance,  $K_B$  means Boltzmann constant ( $1.38 \times 10^{-23} \text{ J/K}$ ),  $T$  indicates Kelvin temperature,  $\epsilon$  and  $\epsilon_0$  are the relative permittivity and the permittivity of vacuum of CdS,  $e$  represents elementary charge and  $A$  is coated electrode area, the

bias voltage applied to the electrodes is expressed by V.

$$FE_{O_2} = \frac{4nF}{I \times t} \times 100\% \quad (14)$$

Where n is the actual number of moles of the product (mol), F is Faraday's constant (96485.34C/mol), I is the photocurrent produced (A) and t is the reaction time (s).

Table S1 Flat band potential ( $V_{fb}$ ) and donor density ( $N_d$ ) of electrodes deduced from Mott-Schottky

| Sample                                 | Condition | Light               |                           | Light+ $\Delta T$   |                           |
|----------------------------------------|-----------|---------------------|---------------------------|---------------------|---------------------------|
|                                        |           | $V_{fb}$ (V vs RHE) | $N_d$ (cm <sup>-3</sup> ) | $V_{fb}$ (V vs RHE) | $N_d$ (cm <sup>-3</sup> ) |
| CdS                                    |           | -0.21               | $1.25 \times 10^{19}$     | -0.20               | $2.02 \times 10^{19}$     |
| CdS/In <sub>2</sub> S <sub>3</sub> -H  |           | -0.36               | $2.12 \times 10^{19}$     | -0.37               | $2.31 \times 10^{19}$     |
| CdS/In <sub>2</sub> S <sub>3</sub> -HC |           | -0.41               | $2.26 \times 10^{19}$     | -0.43               | $2.49 \times 10^{19}$     |

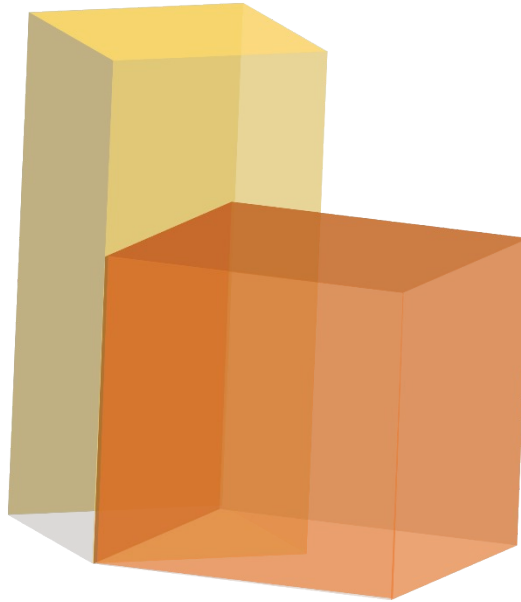

**Fig. S1** Diagram of the crystal transition mechanism

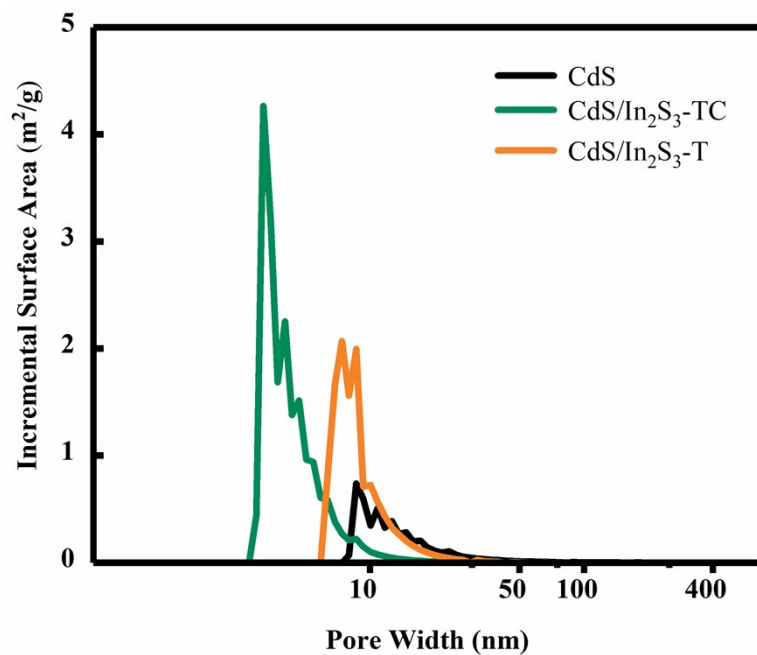

Fig. S2 The pore distribution for the CdS, CdS/In<sub>2</sub>S<sub>3</sub>-T and CdS/In<sub>2</sub>S<sub>3</sub>-TC

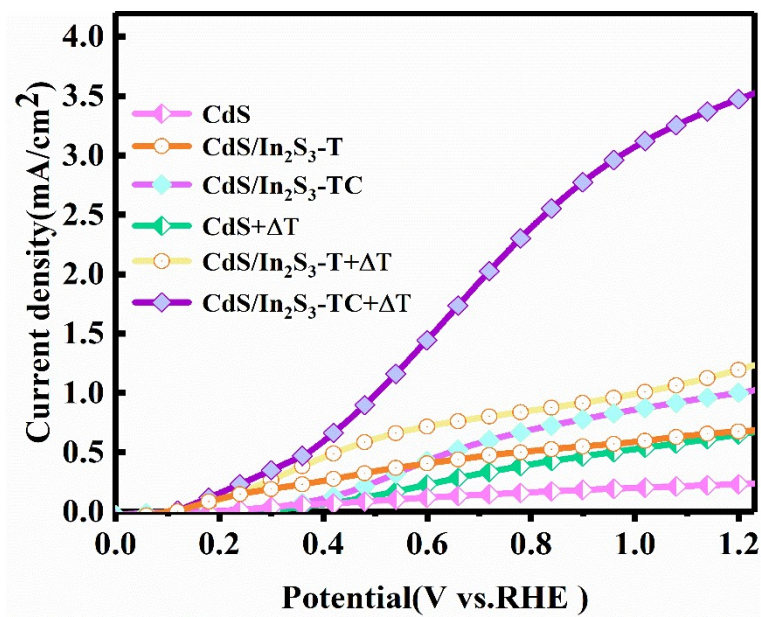

Fig. S3 The LSV curves of different samples under photoelectrocatalytic and pyro-photoelectrocatalytic conditions

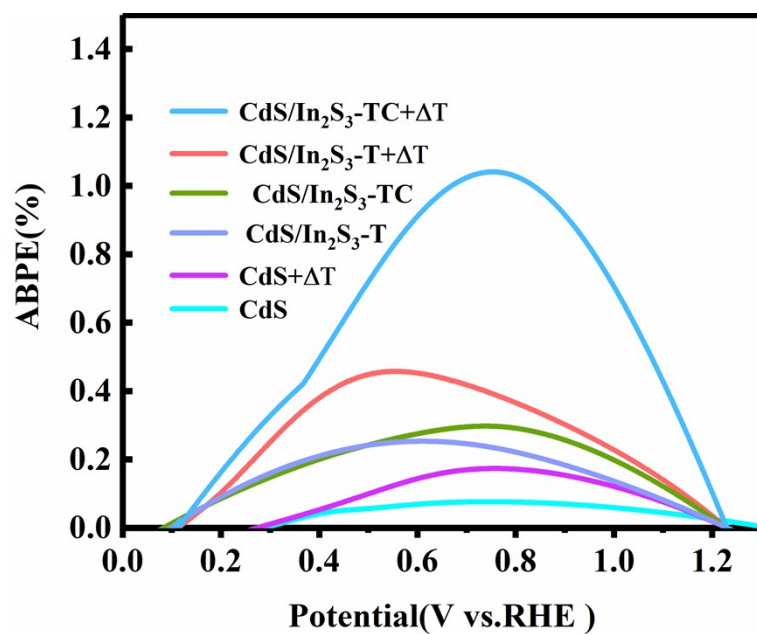

**Fig. S4** The ABPE curves of different samples under photoelectrocatalysis and pyro-photoelectrocatalysis conditions

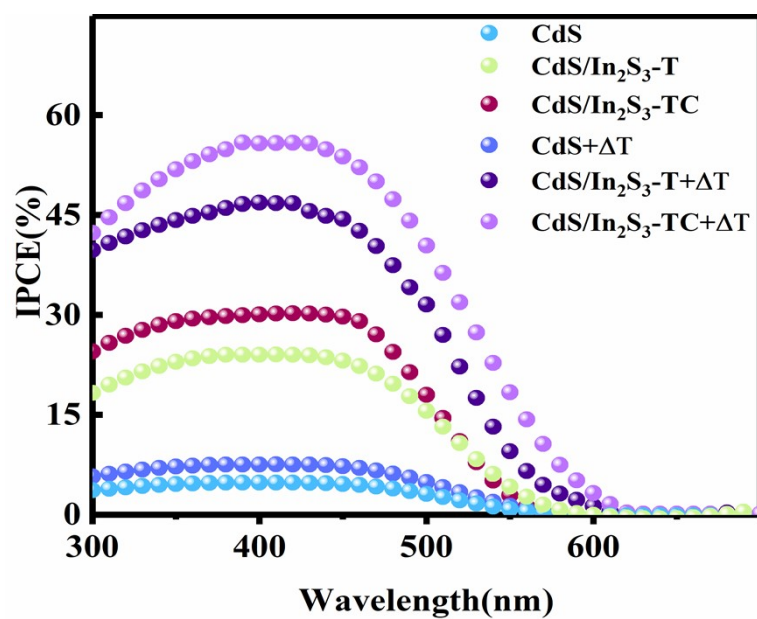

**Fig. S5** The IPCE curves of different samples under photoelectrocatalysis and pyro-photoelectrocatalysis conditions

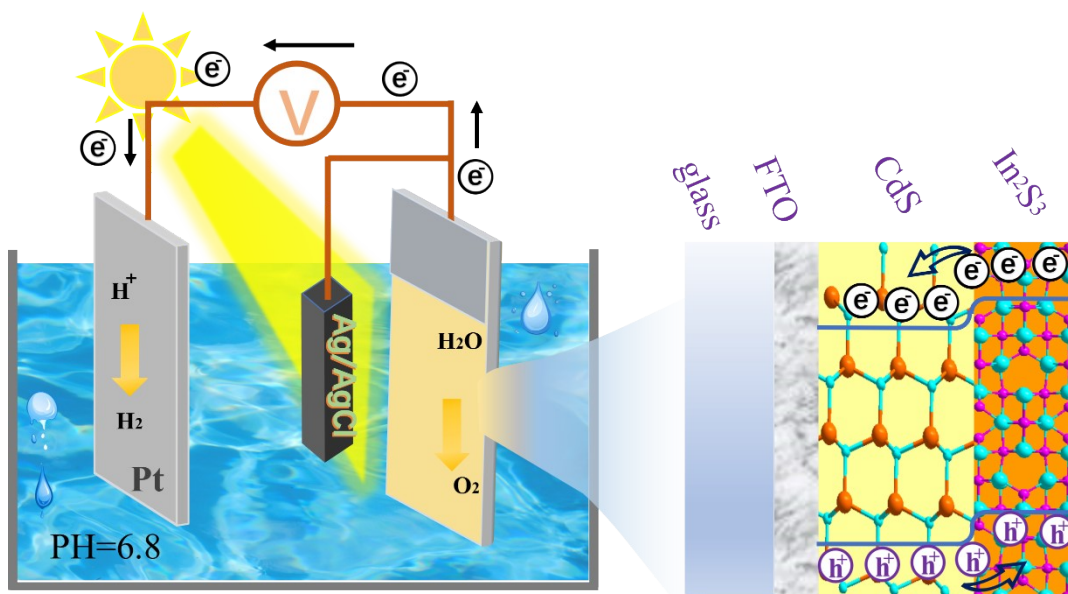

Fig. S6 Mechanism diagram of CdS/In<sub>2</sub>S<sub>3</sub> heterojunctions

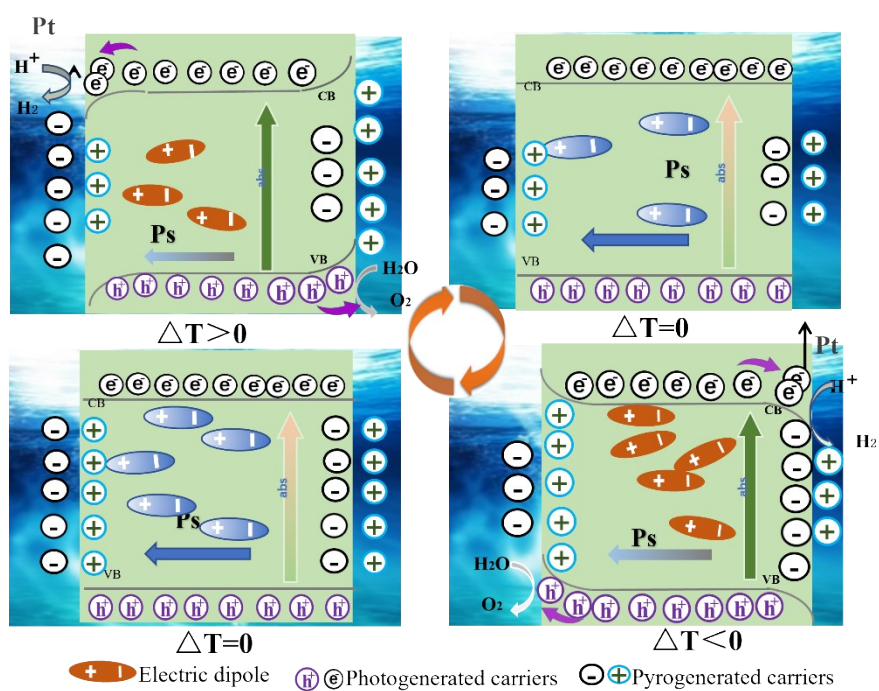

Fig. S7 Diagram of pyroelectric mechanism during temperature change

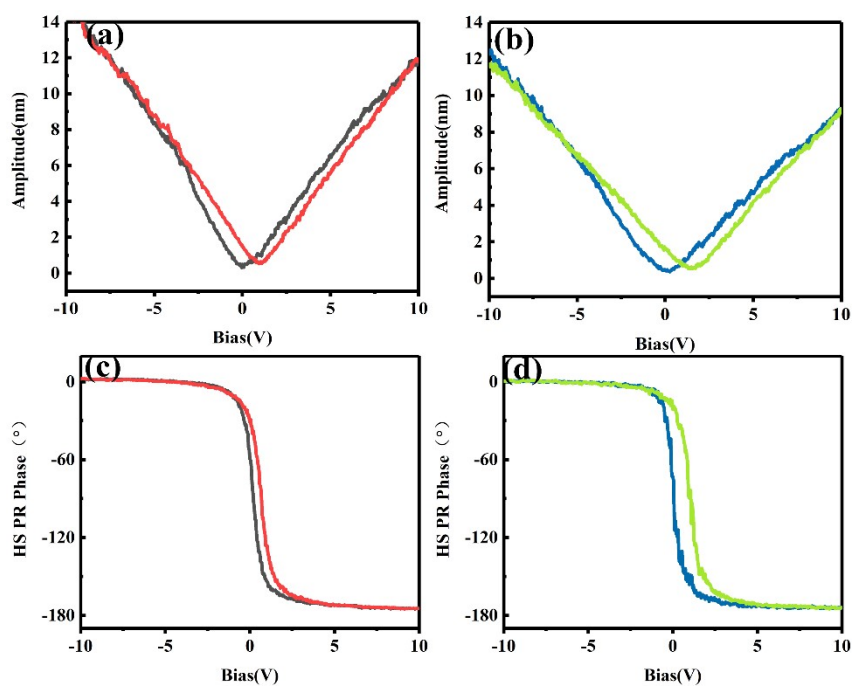

**Fig. S8** Amplitude butterfly loop (a, c) and phase lag loop (b, d) of CdS/In<sub>2</sub>S<sub>3</sub>-T and CdS/In<sub>2</sub>S<sub>3</sub>-TC films

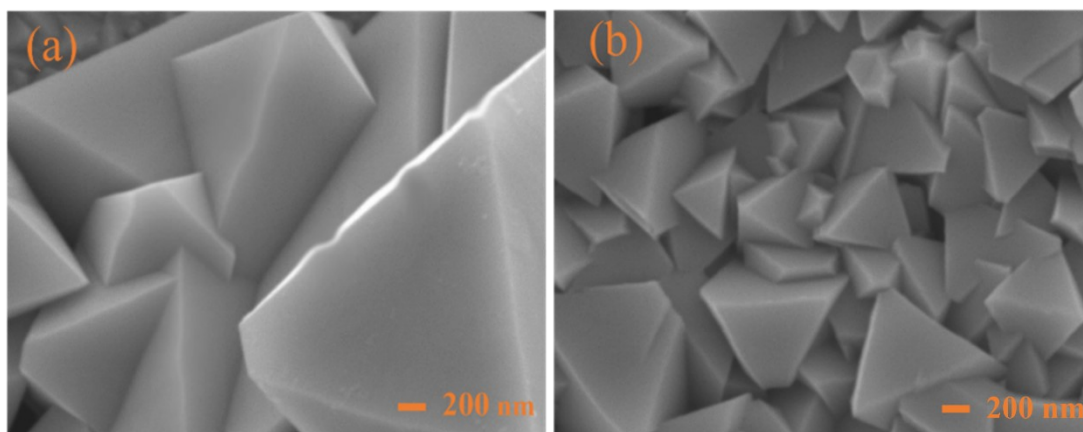

**Fig. S9** SEM patterns of CdS/In<sub>2</sub>S<sub>3</sub>-T(a) and CdS/In<sub>2</sub>S<sub>3</sub>-TC(b) after the stability test

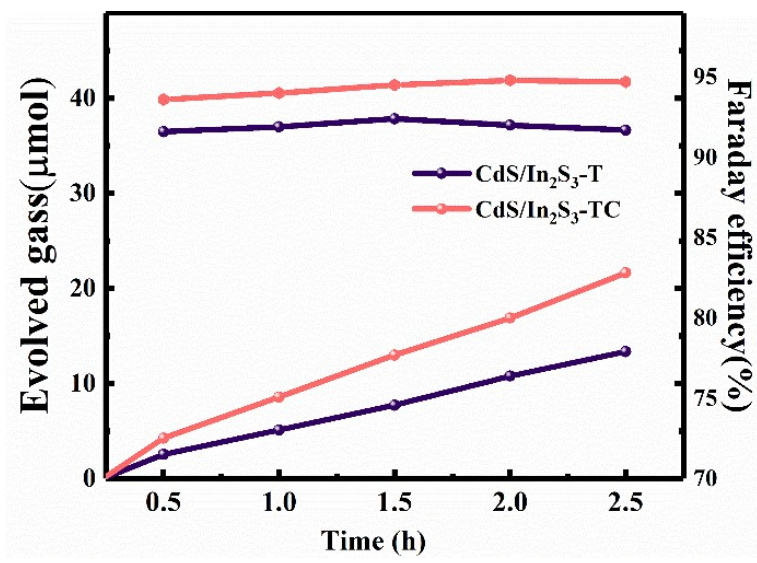

**Fig. S10** The oxygen measurement data and Faraday efficiency of CdS/In<sub>2</sub>S<sub>3</sub>-T and CdS/In<sub>2</sub>S<sub>3</sub>-TC films

## Supporting information

$$\alpha h\nu = A(h\nu - E_g)^n \quad (1)$$

$$E_{FE} = h\nu - E_{cutoff} \quad (2)$$

$$E_{VB} = E_{FE} + E_{onset} - E_e \quad (3)$$

$$E_{CB} = E_{VB} - E_g \quad (4)$$

where  $\alpha$ ,  $\nu$  and  $E_g$  are the absorption coefficient, incident light frequency and band gap, respectively, and  $h$  and  $A$  are constants. Typically, the value of  $n$  is 2 for indirect bandgap semiconductors and 1/2 for direct bandgap semiconductors. Here,  $n = 2$ .  $h\nu$  is the radiant energy ( $h\nu=21.22\text{eV}$ ),  $E_e$  is the energy of free electrons on the hydrogen scale ( $E_e = 4.5 \text{ eV}$ ).

$$E_{RHE} = E_{Ag/AgCl} + 0.0591PH + 0.1976 V \quad (5)$$

$$ABPE = (J_{light} - J_{dark}) \times \left( \frac{1.23 - V_{RHE}}{P_{light}} \right) \quad (6)$$

Here,  $J_{light}$  and  $J_{dark}$  is the photocurrent density under light and dark conditions.  $V_{RHE}$  represents the relationship between applied potential and RHE, and  $P_{light}$  is the intensity of incident light ( $100 \text{ mW/cm}^2$ , AM 1.5 G).

$$IPCE = \frac{1240J}{\lambda P_{light}} \quad (7)$$

$$1/c^2 = \frac{2(V - V_{fb} - \frac{K_B T}{e})}{\epsilon \epsilon_0 e A^2 N_d} \quad (8)$$

$$N_d = \frac{2}{\epsilon \epsilon_0 e} \left[ \frac{1}{c^2} \frac{d}{d_V} \right]^{-1} \quad (9)$$

$$J_{H_2O} = J_{abs} \times \eta_{bulk} \times \eta_{surface} \quad (10)$$

$$J_{Na_2SO_3} = J_{abs} \times \eta_{bulk} \quad (11)$$

$$\eta_{bulk} = J_{Na_2SO_3} / J_{abs} \quad (12)$$

$$\eta_{surface} = J_{H_2O} / J_{Na_2SO_3} \quad (13)$$

$J_{H_2O}$  stands for photocurrent density, and  $J_{abs}$  refers to photon absorption represented by current density (100 % photocurrent of APCE is assumed).  $c$  represents the space charge capacitance,  $K_B$  means Boltzmann constant ( $1.38 \times 10^{-23} \text{ J/K}$ ),  $T$  indicates Kelvin temperature,  $\epsilon$  and  $\epsilon_0$  are the relative permittivity and the permittivity of vacuum of CdS,  $e$  represents elementary charge and  $A$  is coated electrode area, the



bias voltage applied to the electrodes is expressed by V.

$$FE_{O_2} = \frac{4nF}{I \times t} \times 100\% \quad (14)$$

Where n is the actual number of moles of the product (mol), F is Faraday's constant (96485.34C/mol), I is the photocurrent produced (A) and t is the reaction time (s).

Table S1 Flat band potential ( $V_{fb}$ ) and donor density ( $N_d$ ) of electrodes deduced from Mott-Schottky

| Sample                                 | Condition | Light               |                           | Light+ $\Delta T$   |                           |
|----------------------------------------|-----------|---------------------|---------------------------|---------------------|---------------------------|
|                                        |           | $V_{fb}$ (V vs RHE) | $N_d$ (cm <sup>-3</sup> ) | $V_{fb}$ (V vs RHE) | $N_d$ (cm <sup>-3</sup> ) |
| CdS                                    |           | -0.21               | $1.25 \times 10^{19}$     | -0.20               | $2.02 \times 10^{19}$     |
| CdS/In <sub>2</sub> S <sub>3</sub> -H  |           | -0.36               | $2.12 \times 10^{19}$     | -0.37               | $2.31 \times 10^{19}$     |
| CdS/In <sub>2</sub> S <sub>3</sub> -HC |           | -0.41               | $2.26 \times 10^{19}$     | -0.43               | $2.49 \times 10^{19}$     |

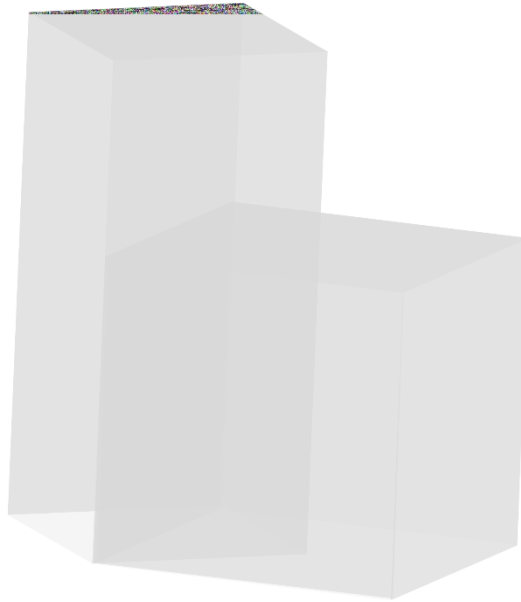

**Fig. S1** Diagram of the crystal transition mechanism

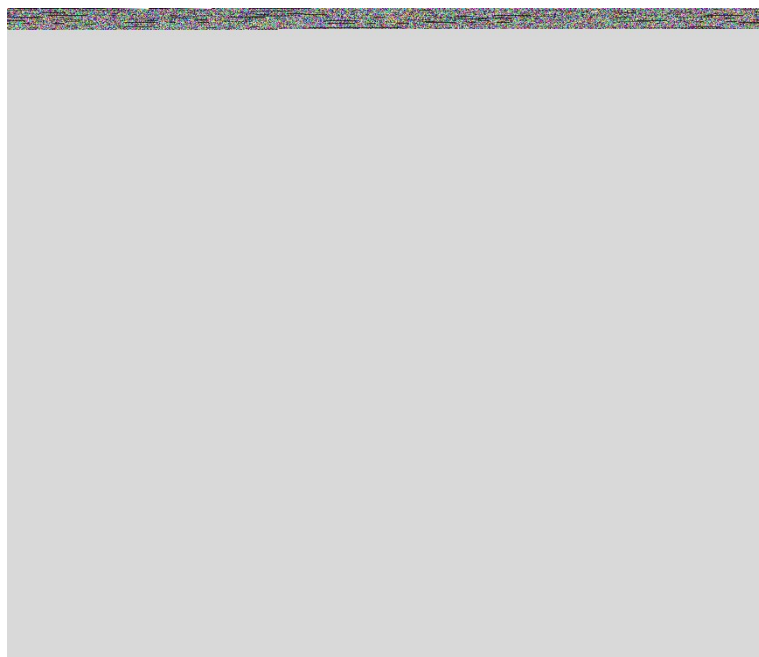

**Fig. S2** The pore distribution for the CdS, CdS/In<sub>2</sub>S<sub>3</sub>-T and CdS/In<sub>2</sub>S<sub>3</sub>-TC

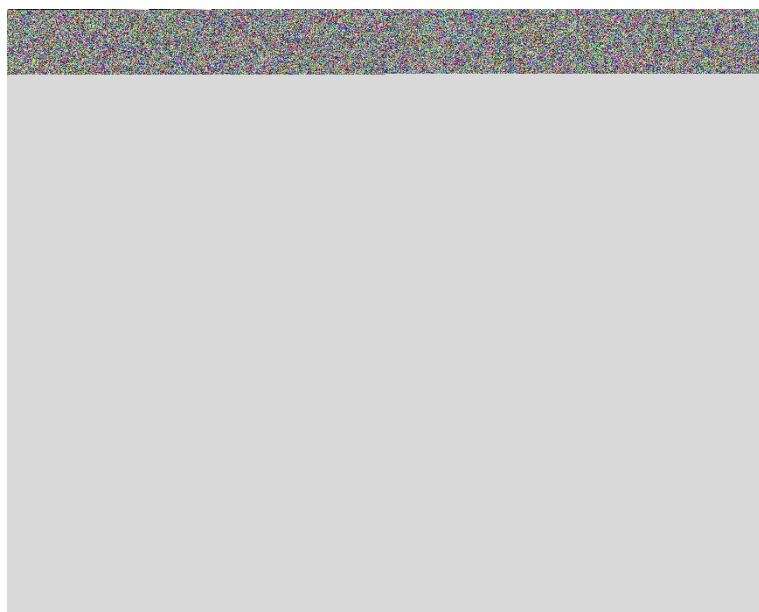

**Fig. S3** The LSV curves of different samples under photoelectrocatalytic and pyro-photoelectrocatalytic conditions

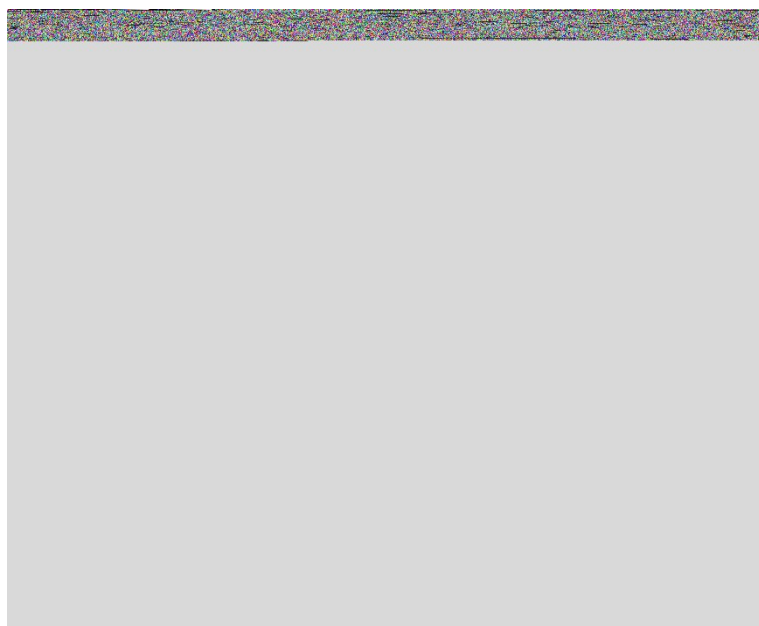

**Fig. S4** The ABPE curves of different samples under photoelectrocatalysis and pyro-photoelectrocatalysis conditions

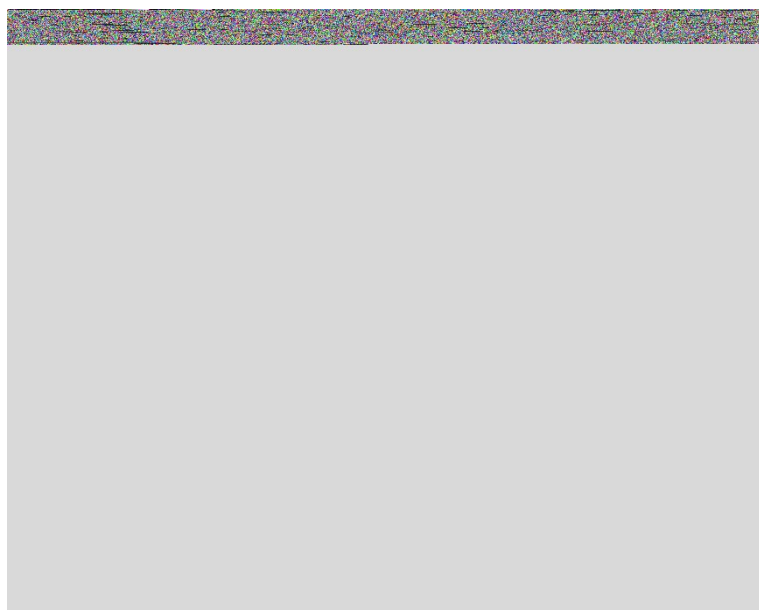

**Fig. S5** The IPCE curves of different samples under photoelectrocatalysis and pyro-photoelectrocatalysis conditions

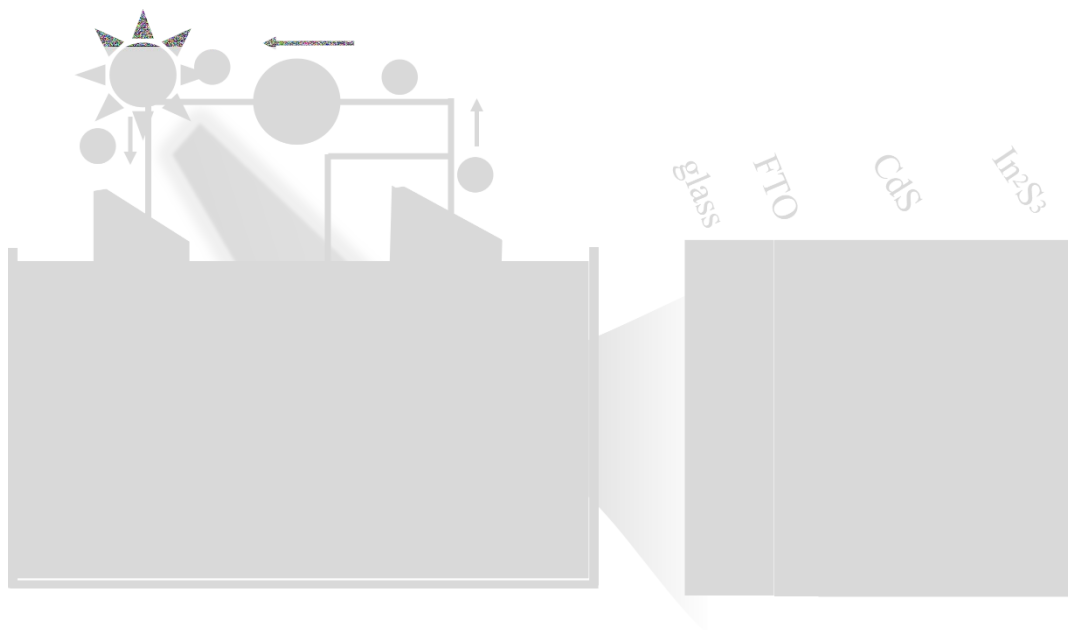

**Fig. S6** Mechanism diagram of CdS/In<sub>2</sub>S<sub>3</sub> heterojunctions

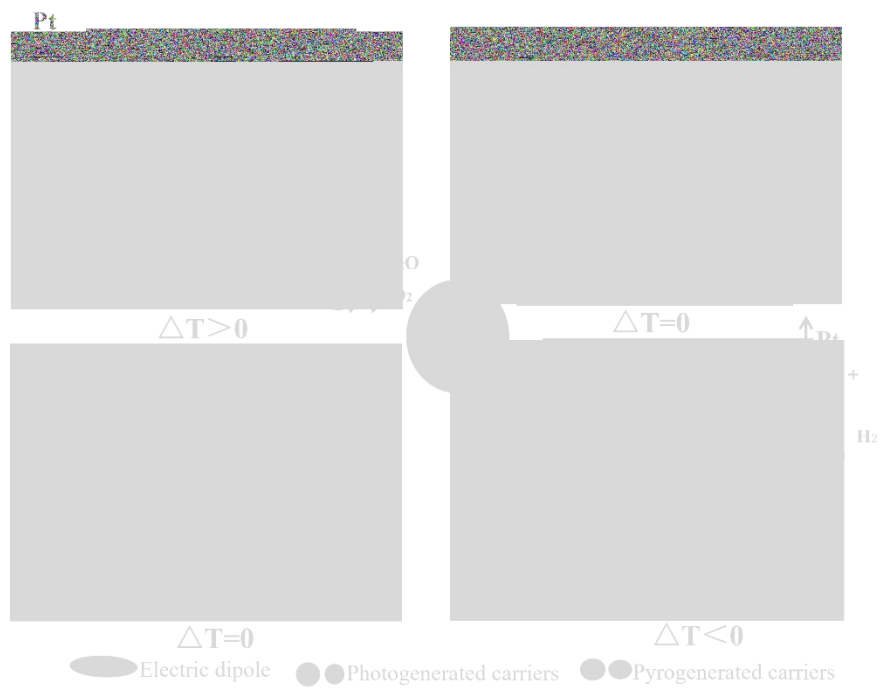

**Fig. S7** Diagram of pyroelectric mechanism during temperature change

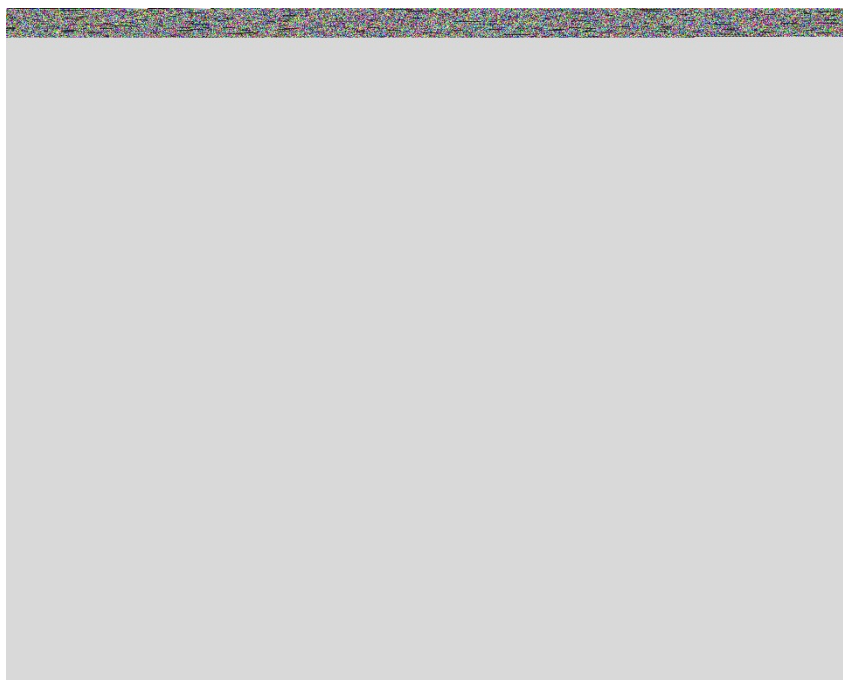

**Fig. S8** Amplitude butterfly loop (a, c) and phase lag loop (b, d) of CdS/In<sub>2</sub>S<sub>3</sub>-T and CdS/In<sub>2</sub>S<sub>3</sub>-TC films

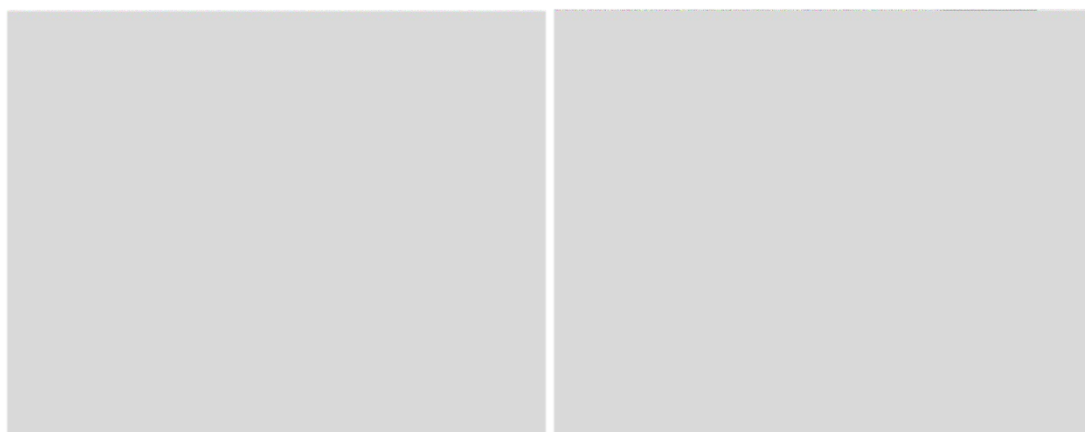

**Fig. S9** SEM patterns of CdS/In<sub>2</sub>S<sub>3</sub>-T(a) and CdS/In<sub>2</sub>S<sub>3</sub>-TC(b) after the stability test

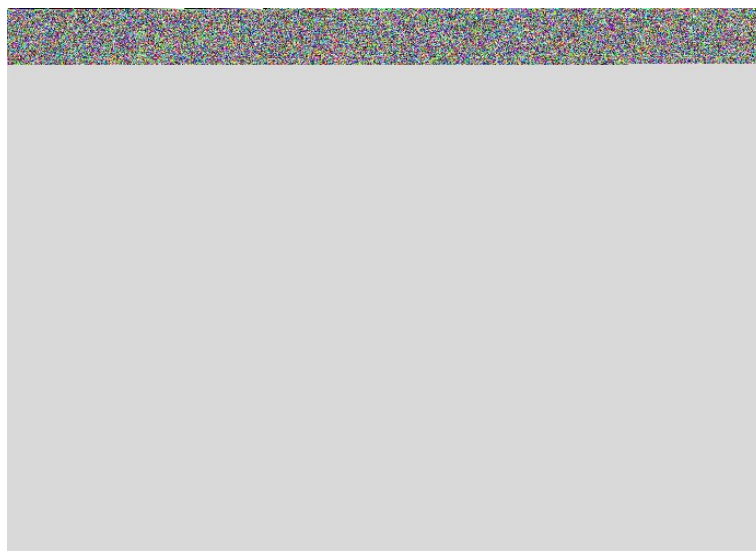

**Fig. S10** The oxygen measurement data and Faraday efficiency of CdS/In<sub>2</sub>S<sub>3</sub>-T and CdS/In<sub>2</sub>S<sub>3</sub>-TC films
